# Supplementary material
Source: publisher figshare collection journal article supplement (https://tandf.figshare.com/articles/dataset/_/7777088)
Supplement: Supplementary file 2 [file 1]

Archive with 4 entries (4 files):
- Supplement 1 - STROBE checklist.docx
- Supplement 2 - QUESTIONNAIRE KNOWLEDGE ASTHMA_English.pdf
- Supplement 3 - QUESTIONNAIRE KNOWLEDGE ASTHMA_Portuguese.pdf
- Supplement 4  - Table 7.docx
