# Supplementary material
Source: publisher figshare collection journal article supplement (https://tandf.figshare.com/articles/dataset/_/7777088)
Supplement: Supplementary file 2 [file 1 › Supplement 3 - QUESTIONNAIRE KNOWLEDGE ASTHMA_Portuguese.pdf]

## **QUESTIONNAIRE ON KNOWLEDGE ABOUT BRONCHIAL ASTHMA PORTUGUESE VERSION**

1. Os sintomas da asma são devidos a
  - a. Aperto dos brônquios
  - b. Abertura dos brônquios
  - c. Não sei
  - d. Não respondo
2. A asma causa episódios de falta de ar, mas estes não são realmente perigosos
  - a. Concordo
  - b. Discordo
  - c. Não sei
  - d. Não respondo
3. Que tipo de medicação se deve usar numa crise aguda de asma?
  - a. Bomba para abrir os brônquios
  - b. Bomba para prevenir as crises
  - c. Tomar antialérgicos
  - d. Não sei
  - e. Não respondo
4. Quais são os efeitos secundários da medicação usada para abrir os brônquios?
  - a. Nervosismo, palpitações (coração a bater muito), tremor das mãos
  - b. Diarreia e febre
  - c. Não sei
  - d. Não respondo
5. Quando é que uma pessoa com asma deve ir ao Serviço de Urgência?
  - a. Se houver desconforto leve, falta de ar ligeira que alivia com a medicação
  - b. Se surgir dificuldade em dizer frases completas, e/ou falta de ar sem alívio com a medicação, e/ou grande cansaço
  - c. Não sei
  - d. Não respondo

6. Mesmo fora das crises, as pessoas com asma necessitam de fazer medicação regularmente
- Concordo
  - Discordo
  - Não sei
  - Não respondo
7. Quando não estão em crise os asmáticos podem fazer desporto
- Concordo
  - Discordo
  - Não sei
  - Não respondo
8. Mesmo com um acompanhamento médico óptimo a maioria dos asmáticos não pode ter uma vida normal
- Concordo
  - Discordo
  - Não sei
  - Não respondo
9. A asma é uma doença que pode matar.
- Concordo
  - Discordo
  - Não sei
  - Não respondo
10. A asma começa mais frequentemente na idade de criança ou adulto jovem do que no idoso.
- Concordo
  - Discordo
  - Não sei
  - Não respondo
11. A asma é uma doença crónica (que continua mesmo nos períodos em que não apresenta sintomas).
- Concordo

- b. Discordo
- c. Não sei
- d. Não respondo

12. As vias aéreas dos pulmões (brônquios) estão inflamadas na asma.

- a. Concordo
- b. Discordo
- c. Não sei
- d. Não respondo

13. As vias aéreas dos pulmões (brônquios) estão inflamadas na asma mesmo fora das crises.

- a. Concordo
- b. Discordo
- c. Não sei
- d. Não respondo

14. Quando um asmático se expõe ao frio, faz exercício físico ou está com gripe, isto pode desencadear uma crise de asma.

- a. Concordo
- b. Discordo
- c. Não sei
- d. Não respondo

8. A asma não pode ser curada mas pode ser bem controlada.

- a. Concordo
- b. Discordo
- c. Não sei
- d. Não respondo

9. As pessoas com asma não têm nenhuma forma (por exemplo um exame, análise ou teste) de saberem se a sua respiração está bem.

- a. Concordo
- b. Discordo
- c. Não sei

d. Não respondo

10. Certos desportos, como a natação e a hidroginástica, são melhores para os asmáticos

a. Concordo

b. Discordo

c. Não sei

d. Não respondo

11. Os asmáticos NÃO devem praticar desporto

a. Concordo

b. Discordo

c. Não sei

d. Não respondo

12. Um doente asmático que tem de usar várias vezes por semana a bomba para as crises (SOS) é um doente que tem a sua asma controlada.

a. Concordo

b. Discordo

c. Não sei

d. Não respondo

13. Evitar a exposição a situações que podem desencadear uma crise de asma, como o frio, o fumo do tabaco e o pó da casa, pode melhorar o controlo da asma.

a. Concordo

b. Discordo

c. Não sei

d. Não respondo
