# Supplementary material
Source: publisher figshare collection journal article supplement (https://tandf.figshare.com/articles/dataset/_/7777088)
Supplement: Supplementary file 2 [file 1 › Supplement 4 - Table 7.docx]

**SUPPLEMENTARY MATERIAL 4**

Table 7 – Relationship between perceived performance and technique.

|  | | Perceived performance | | | *p* ª |
| --- | --- | --- | --- | --- | --- |
| Correct | Incorrect | Don’t Know |
| Non-Elderly (n=130) | Correct Technique  Acceptable Technique  Incorrect Technique | 19 (17.3%)  64 (58.2%)  27 (24.5%) | 0 (0.0%)  1 (33.3%)  2 (66.7%) | 1 (5.9%)  7 (41.2%)  9 (52.9%) | 0.082 |
| Total | 110 (84.6%) | 3 (2.3%) | 17 (13.1%) |
| Elderly (n=118) | Correct Technique  Acceptable Technique  Incorrect Technique | 14 (12.7%)  67 (60.9%)  29 (26.4%) | 0 (0.0%)  3 (100.0%)  0 (0.0%) | 2 (40.0%)  2 (40.0%)  1 (20.0%) | 0.328 |
| Total | 110 (93.2%) | 3 (2.5%) | 5 (4.2%) |

ª Fisher’s Exact Test
